# Supplementary figures and images for: CTRP1 Knockout Attenuates Tumor Progression in A549 and HCT116 Cancer Cells
Source: MDPI journal article supplement (doi:10.3390/cancers14184495), 2022-09-16

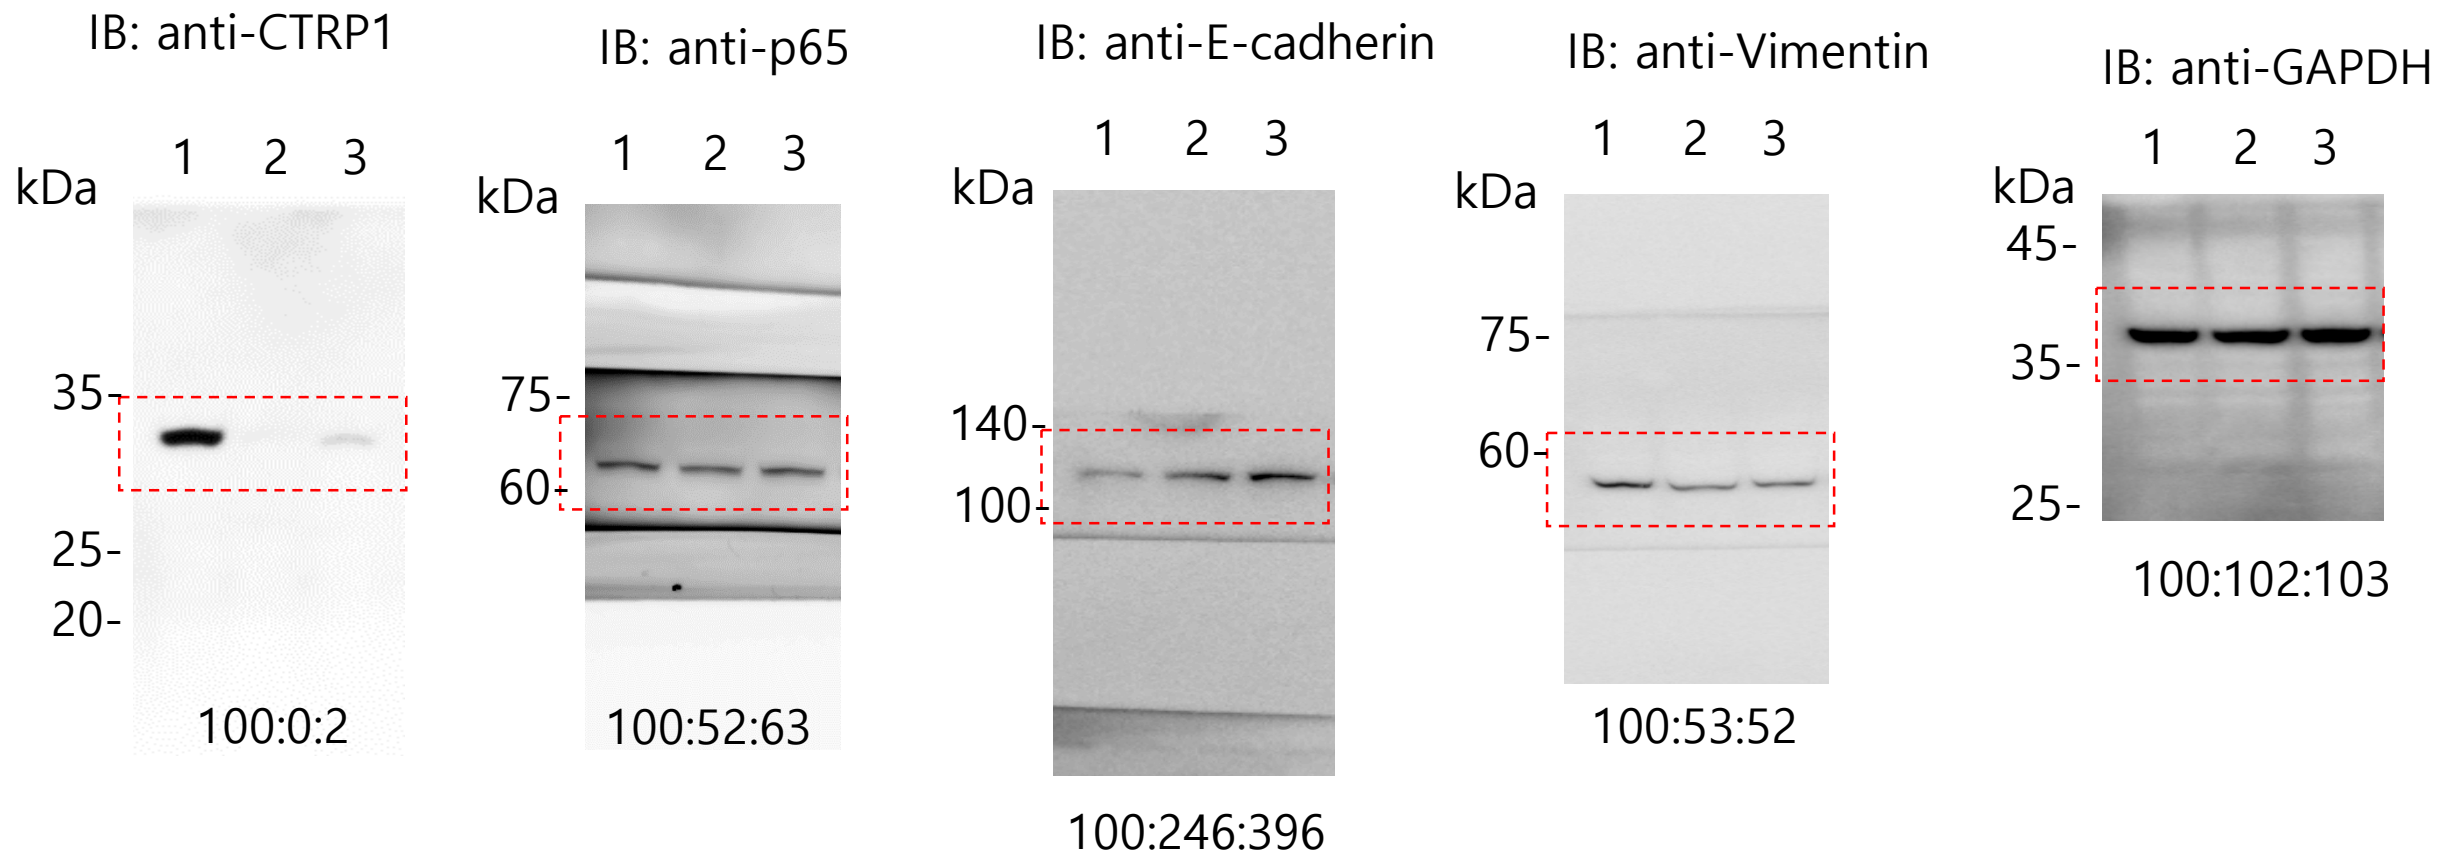

Figure 1A

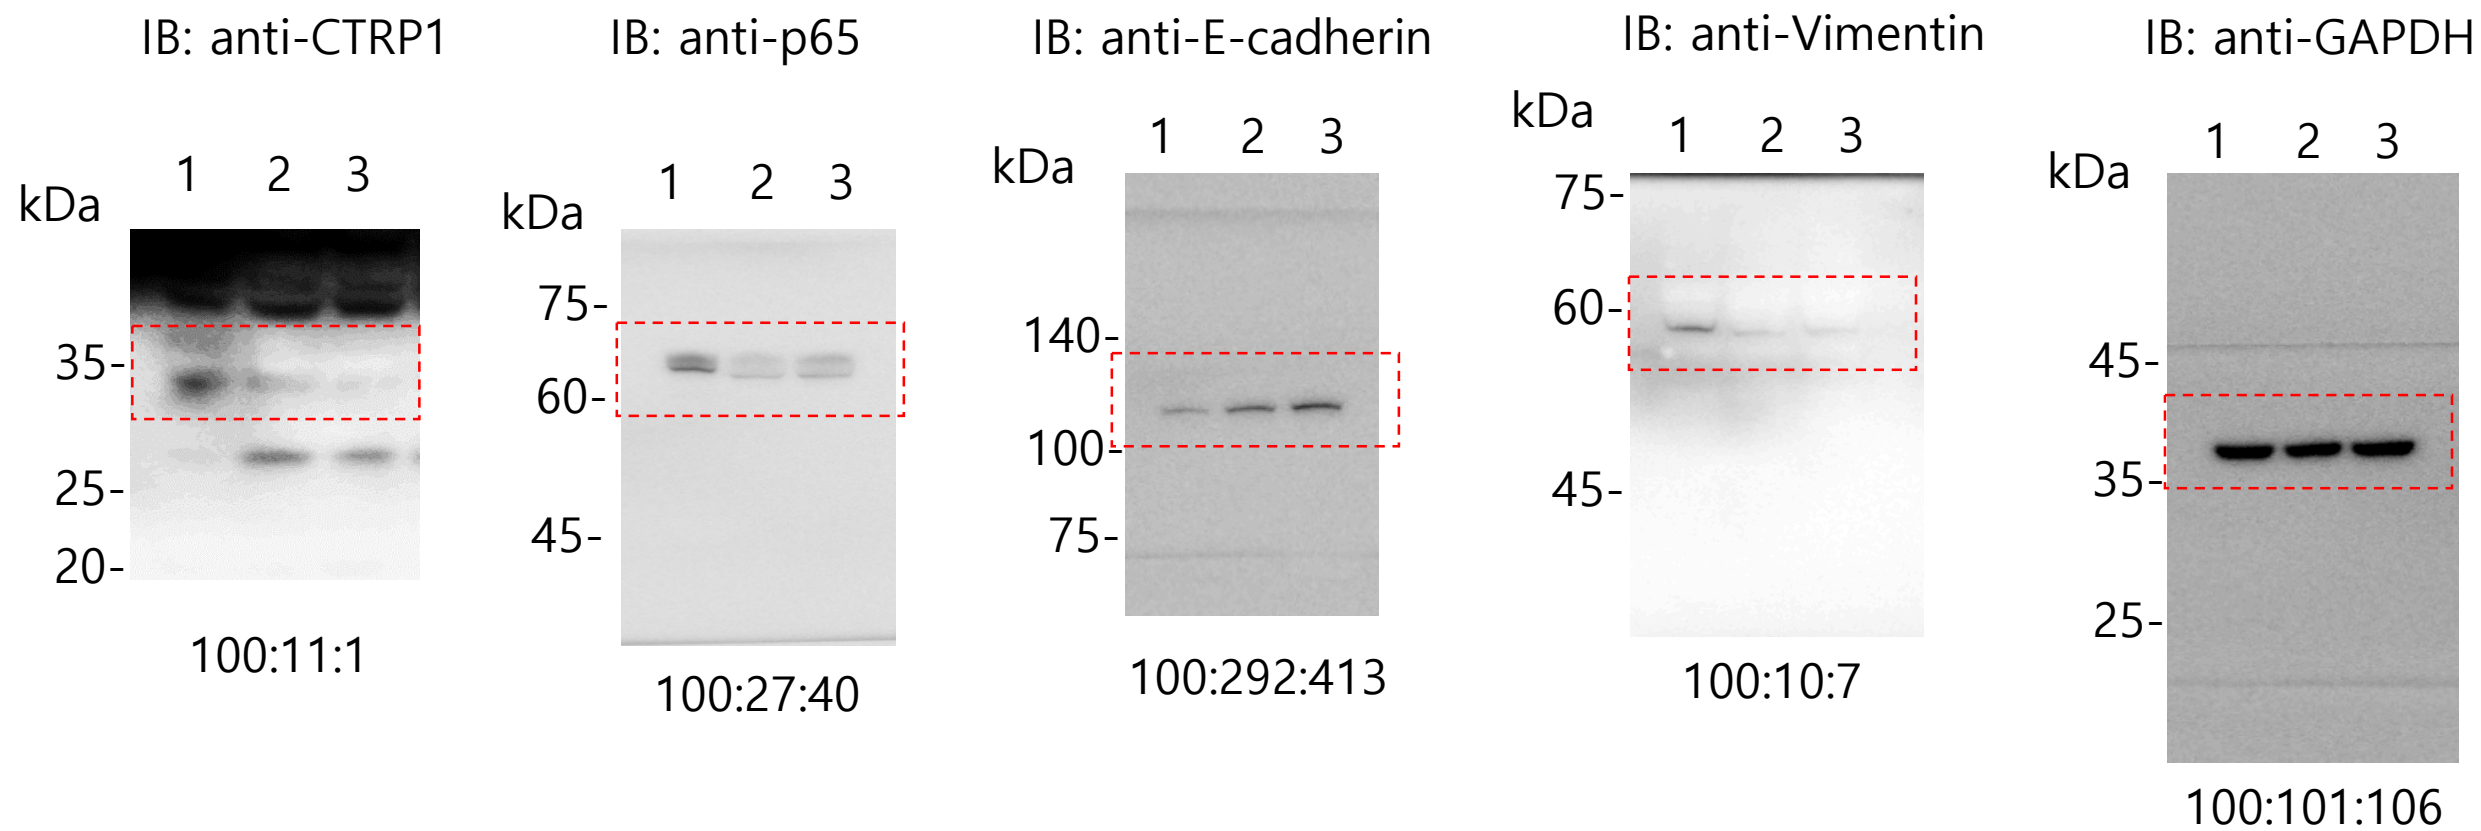

Figure 1A

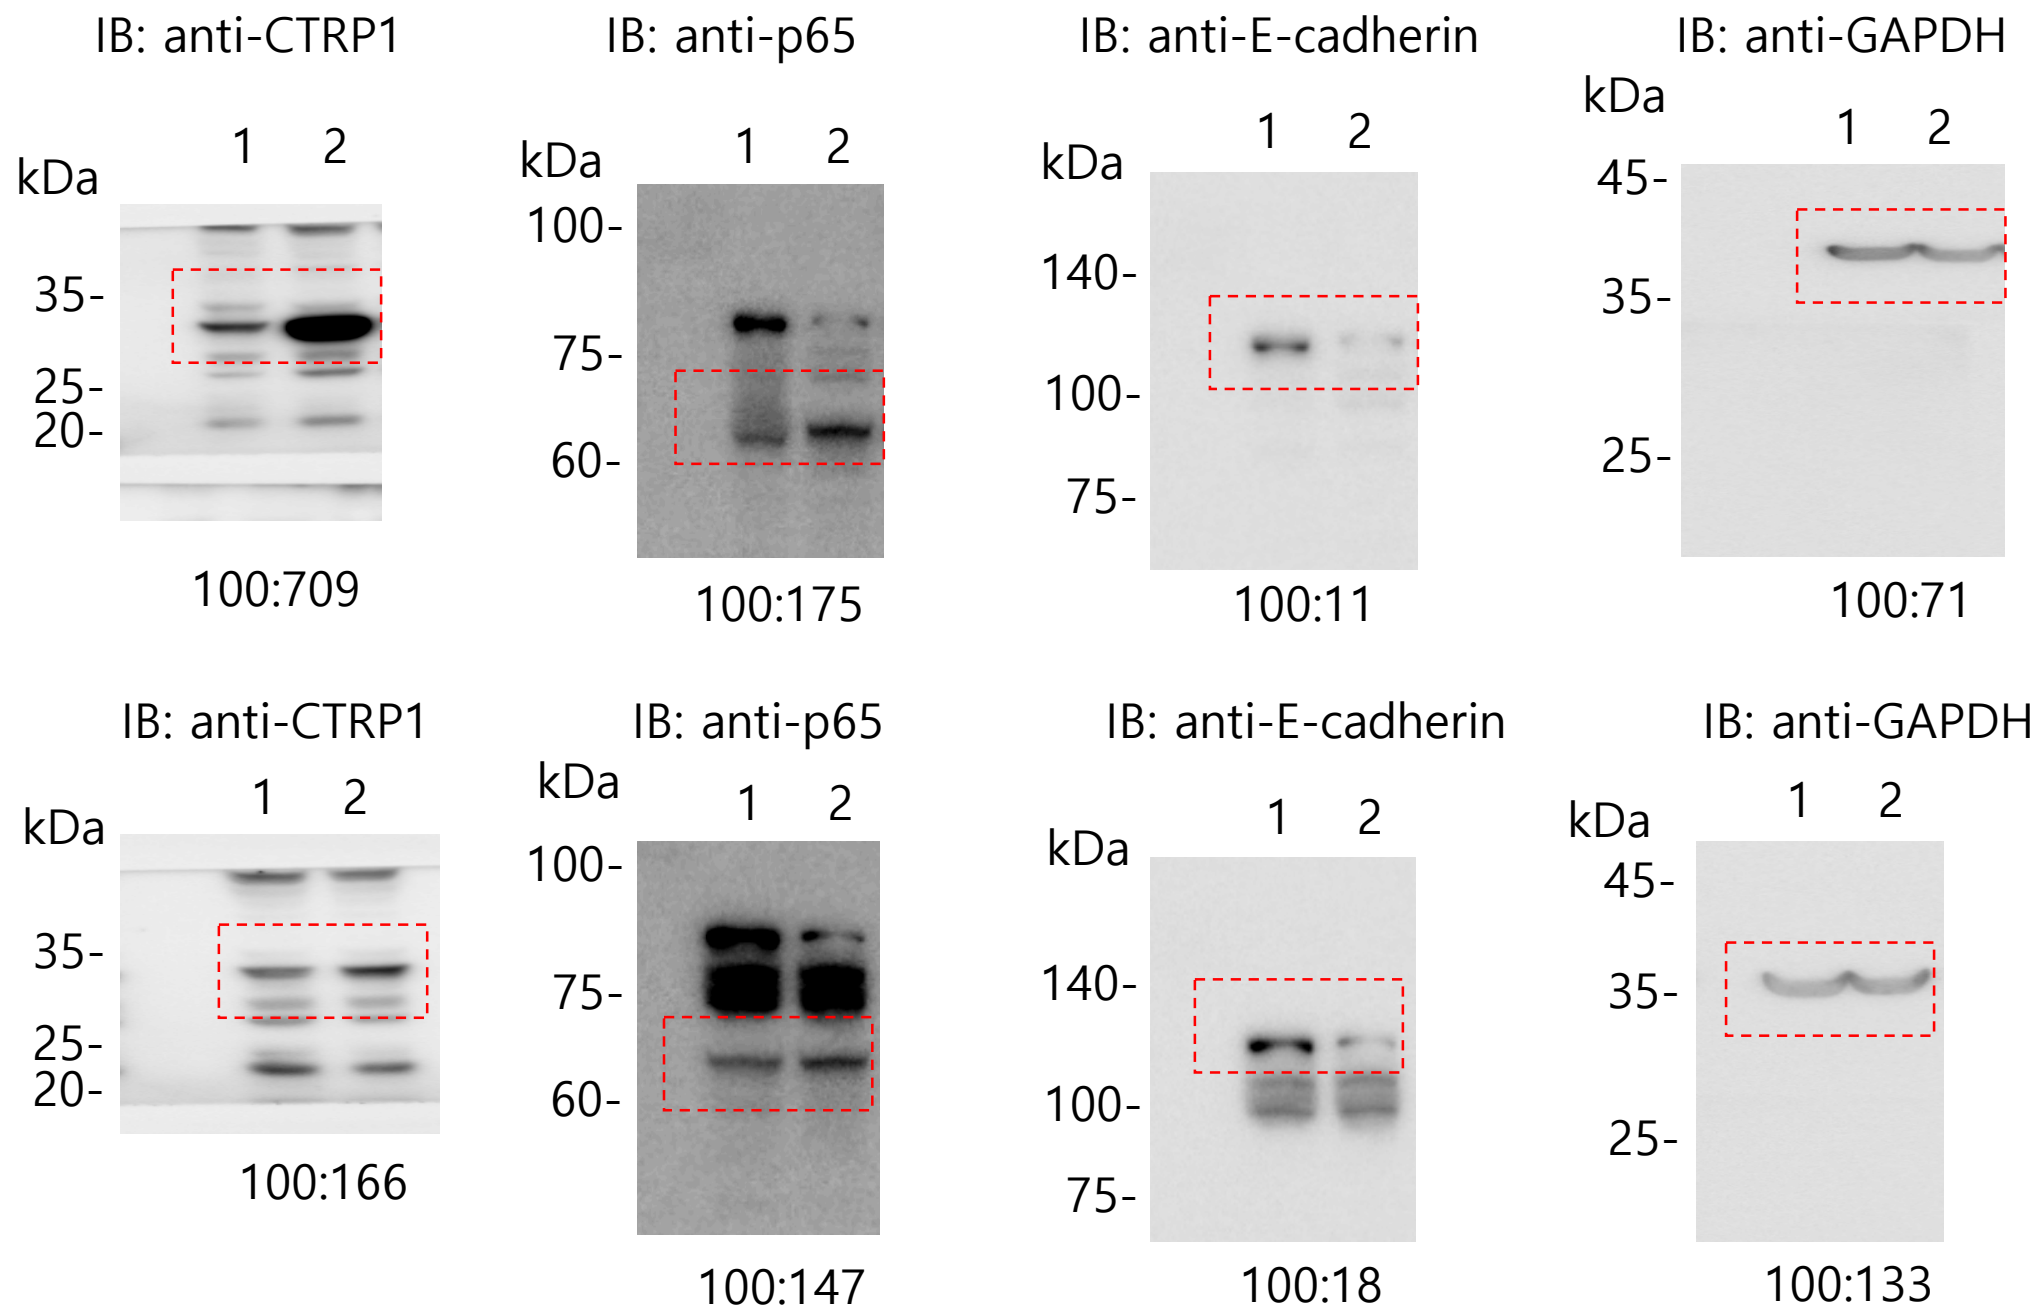

Figure S1

Supplement: s1 [file s1]
